# Supplementary material
Source: ML conference proceedings conference paper supplement (https://proceedings.mlr.press/v51/auer16.html)
Supplement: Supplementary file 1 [file auer16-supp.pdf]

## A Illustration of Quantities Introduced in Section 2

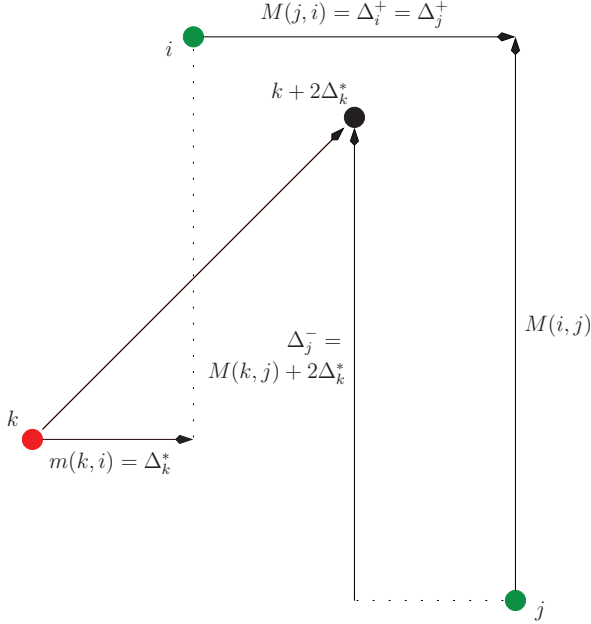

Figure 6: Example for the illustration of the quantities introduced in Section 2.

Figure 6 gives an example with two objectives, where operating points  $i$  and  $j$  are on the Pareto front, while point  $k$  is not. Moving  $k$  to the right by  $m(k, i)$ , it would not be strongly dominated by  $i$  anymore. This is also the distance of  $k$  to the Pareto front, that is,  $\Delta_k^* = m(k, i)$ .

The quantity  $M(j, i)$  gives the amount by which point  $i$  has to be moved to dominate  $j$ . Since in our example  $M(j, i) < M(i, j)$ , this is also the (first component of the) required accuracy<sup>7</sup> for  $i$  and  $j$ , that is,  $\Delta_i^+ = \Delta_j^+ = M(j, i)$ .

Finally, moving  $k$  by  $2\Delta_k^*$ , the modified point would be on the Pareto front. Then the (second component of the) required accuracy for  $j$  would be  $\Delta_j^- = M(k, j) + 2\Delta_k^*$ , since if  $j$  is moved by this amount it would appear to dominate the modified operating point  $k$ .

## B Proof of the Lower Bound

*Proof sketch for Theorem 17.* We construct small modifications of the given operating points, such that the output of the algorithm has to change to remain correct. We argue that these small changes can only be

<sup>7</sup>Recall that the required estimation accuracy for a point  $j$  on the Pareto front is defined as  $\Delta_j = \min\{\Delta_j^+, \Delta_j^-\}$ .

detected reliably if the operating points are sampled sufficiently often, as given by the theorem.

We use distributions  $\mathcal{D}_i$  with fully correlated objective values:  $\mathcal{D}_i\{\mathbf{y}_i + \frac{1}{4}(1, \dots, 1)\} = p_i$  and  $\mathcal{D}_i\{\mathbf{y}_i - \frac{1}{4}(1, \dots, 1)\} = 1 - p_i$ , where  $p_i$  is chosen to give the desired mean. For the given operating points  $p_i = \frac{1}{2}$ . By choosing  $p_i \in [\frac{1}{4}, \frac{3}{4}]$  the operating point can be increased or decreased by up to  $\frac{1}{8}$ .

We now consider the modifications of the operating points that require a change of the output of the algorithm:

Let  $i, j \in P^*$  with  $\Delta_i^+ = M(i, j)$ . Then without modification both  $i$  and  $j$  have to be in the output  $P$  of the algorithm. With the modification  $\mathbf{y}'_i = \mathbf{y}_i - 3\tilde{\Delta}_i^{\epsilon_0}$ , we have  $m(i, j) \geq 2\epsilon_0$  such that  $i$  must not appear in the output  $P$ .

If  $i, j \in P^*$  with  $\Delta_i^+ = M(j, i)$ , then with the modification  $\mathbf{y}'_i = \mathbf{y}_i + 3\tilde{\Delta}_i^{\epsilon_0}$ , we have  $m(j, i) \geq 2\epsilon_0$  such that  $j$  must not appear in  $P$ .

Let  $i \notin P^*$ . Since the unmodified suboptimal point  $i$  may or may not appear in a correct output  $P$ , we consider two cases, depending on the probability that  $i \in P$ . First we assume that for the unmodified  $\mathbf{y}_i$ , with probability  $\geq \frac{1}{2}$  the algorithm outputs a  $P$  with  $i \notin P$ . Then we consider the modification  $\mathbf{y}'_i = \mathbf{y}_i + 2\tilde{\Delta}_i^{\epsilon_0}$ . This makes the modified operating point Pareto optimal such that it has to appear in  $P$ . Secondly we assume that with probability  $\geq \frac{1}{2}$  the unmodified  $\mathbf{y}_i$  is in  $P$  (because  $i$  is close to the Pareto front). Then the modified point  $\mathbf{y}'_i = \mathbf{y}_i - 2\tilde{\Delta}_i^{\epsilon_0}$  has distance  $\geq 2\epsilon_0$  from the Pareto front and must not appear in the output  $P$ .

We see that the algorithm has to detect any of these changes to provide a correct output. From a standard argument it follows, that with probability  $\delta$  the algorithm cannot distinguish between a modified and an unmodified operating point  $i$ , if the operating point is not sampled  $\Omega\left(\frac{1}{(\tilde{\Delta}_i^{\epsilon_0})^2} \log\left(\frac{1}{\delta}\right)\right)$  times, see e.g. Even-Dar et al. (2002). Summing over all operating points gives the lower bound of the theorem.  $\square$
